# Supplementary figures and images for: Inducible Nitric Oxide Synthase Drives mTOR Pathway Activation and Proliferation of Human Melanoma by Reversible Nitrosylation of TSC2
Source: Oxford University Press journal article supplement (doi:10.1158/0008-5472.can-13-0588), 2014-01-07

# Supplementary S6

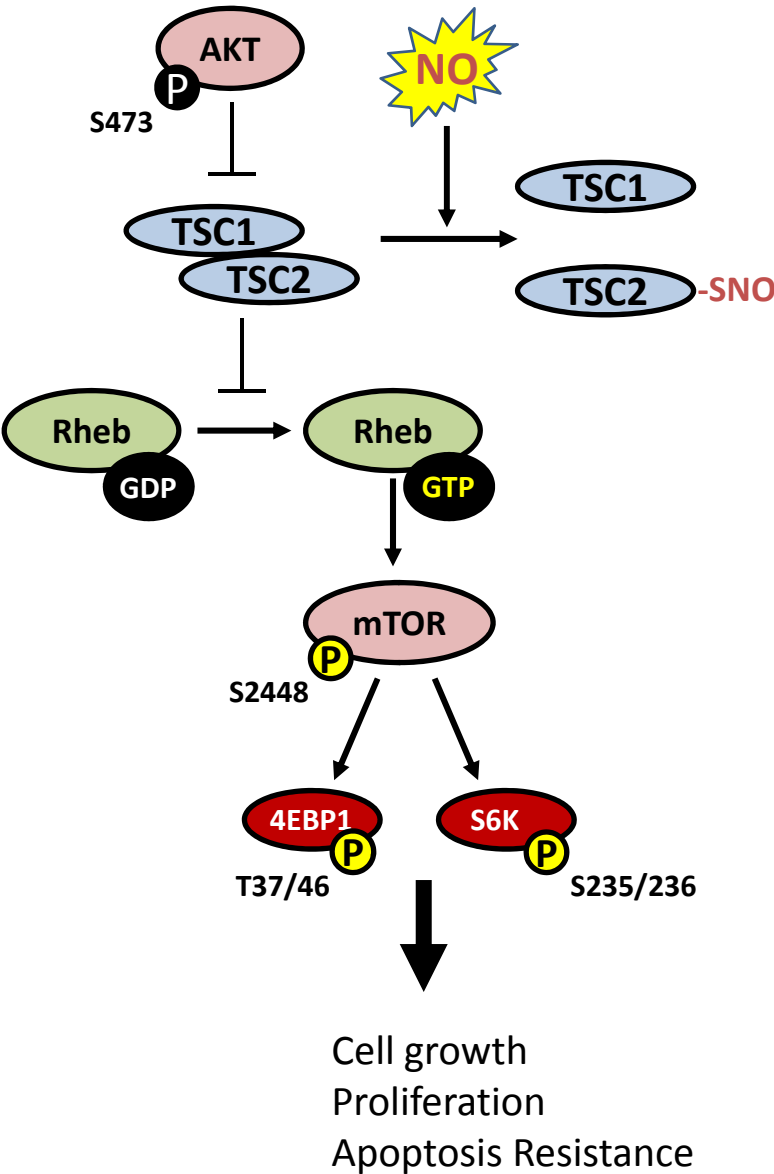

Supplement: 00085472can130588-sup-fig6.pdf [file 00085472can130588-sup-fig6.pdf]
